# Differential dynamics of the mammalian mRNA and protein expression response to misfolding stress

Zhe Cheng<sup>\*1</sup>, Guoshou Teo <sup>\*2</sup>, Sabrina Krueger<sup>3</sup>, Tara M. Rock<sup>1</sup>, Hiromi W.L. Koh<sup>2</sup>, Hyungwon Choi<sup>§,2,#</sup>,  
Christine Vogel<sup>§,1,#</sup>

<sup>\*</sup>, <sup>§</sup> equally contributing authors

<sup>1</sup> Center for Genomics and Systems Biology, New York University, New York, USA

<sup>2</sup> Saw Swee Hock School of Public Health, National University Singapore and National University Health System, Singapore

<sup>3</sup> Max-Delbruck-Center, Berlin, Germany

<sup>#</sup> Corresponding author: [hyung\\_won\\_choi@nuhs.edu.sg](mailto:hyung_won_choi@nuhs.edu.sg), [cvogel@nyu.edu](mailto:cvogel@nyu.edu)

Running title:

Protein expression dynamics during ER stress

# **Standfirst text**

Using a new statistical tool to analyze time-series protein and matching mRNA concentration data, this study deconvoluted the contributions of mRNA and protein level regulation in the response of mammalian cells to stress of the endoplasmatic reticulum.

- We quantified protein and mRNA concentrations for 3,235 genes across two replicates and time points, with a high-confidence dataset of 1,237 genes/mRNAs.
- We use a new statistical tool to quantify the contribution of regulatory processes, and we find that mRNA and protein level regulation play similarly important roles.
- mRNA and protein level regulation have different dynamics: mRNA concentrations spike in their change and return to pre-perturbation levels, while protein concentrations switch in their behavior and reach a new steady-state.
- We generated hypotheses on modes of regulation for several groups of genes.

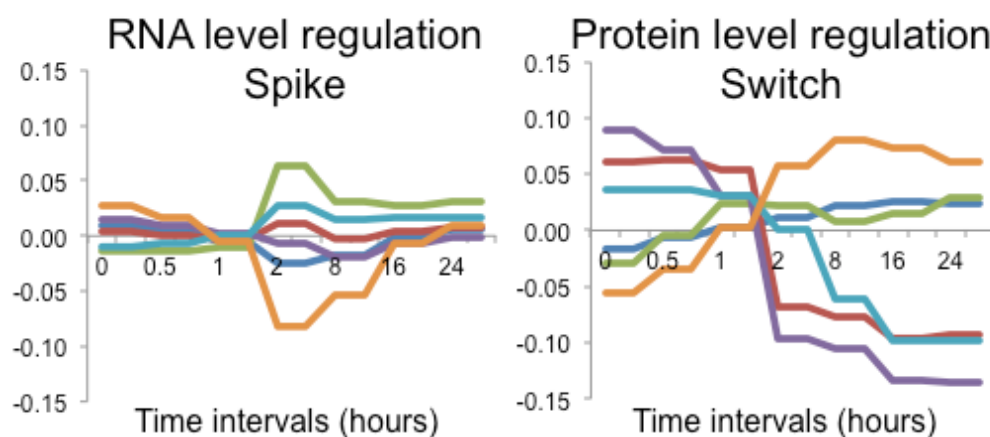

## **Abstract**

The relative importance of regulation at the mRNA versus protein level is subject to ongoing debate. To address this question in a dynamic system, we mapped the proteomics and transcriptomics changes in mammalian cells responding to stress induced by dithiothreitol over 30 hours. Specifically, we estimated the kinetic parameters for synthesis and degradation of RNA and proteins, and deconvoluted response patterns common and unique to each regulatory level using a new statistical tool. Overall, both regulatory levels were equally important, but differed in their impact on molecule concentrations. Both mRNA and protein changes peaked between two and eight hours, but mRNA expression fold changes were much smaller than those of the proteins. Further, mRNA concentrations were regulated in a transient, spike-like pattern and returned to values close to pre-treatment levels by the end of the experiment. In contrast, protein concentrations switched only once and established a new steady state, consistent with the dominant role of protein regulation during misfolding stress. Finally, we generated hypotheses on specific regulatory modes for example groups of genes.

Words: 173 (of 175 max)

## **Introduction**

Technological advances have enabled a new generation of gene expression analysis, now generating genome-wide mRNA and matching protein concentration data over multiple conditions or in a time course. Integrative analyses combining these complementary technologies are particularly valuable when studying the dynamics of the cellular behavior in response to a stimulus, and first tools and results have emerged (Jovanovic et al, 2015; Robles et al, 2014; Vogel et al, 2011). In the literature, there is a growing consensus that gene expression regulation is much more intricate than assumed for many years (Vogel & Marcotte, 2012), and the exact contributions of regulation at the RNA-level, i.e. transcription and RNA degradation, versus regulation at the protein-level, i.e. translation and protein degradation, are subject to ongoing debate. Their estimated, attributable fractions range from as much as 59% for protein-level regulation, to as little as 16-44% (Li & Biggin, 2015; Schwanhauser et al, 2011; Vogel et al, 2010) in steady-state systems, i.e. in cells growing under normal conditions without perturbation. In comparison, in yeast responding to various treatments, protein and mRNA expression often disagree substantially (Berry & Gasch, 2008; Fournier et al, 2010; Lackner et al, 2012; Lee et al, 2011; Vogel et al, 2011). Interestingly, this discrepancy appears to be stronger for down-regulated than for up-regulated genes, indicating importance of protein degradation in attenuating gene expression (Berry & Gasch, 2008; Lee et al, 2011).

Since post-transcriptional regulation is much more intricate in mammalian cells than in yeast, e.g. with respect to miRNA based translation repression or alternative splicing, such time-resolved analyses of mRNA and matching protein concentrations for higher organisms are particularly in demand. A few time-resolved analyses of the mammalian mRNA and corresponding protein expression changes have been reported recently, e.g. studies that monitored progression of mouse liver cells through the cell cycle (Robles et al, 2014) or the response of dendritic cells to lipopolysaccharide (LPS) treatment (Jovanovic et al, 2015). Although substantial protein expression changes were observed in both studies, RNA-level regulation appeared to be stronger than that of protein-level changes – fueling the debate on the relative importance of transcription, translation, and degradation.

To quantify the contributions of different regulatory levels and identify genes and time points at which these significant changes occur, we recently developed a statistical framework, called Protein Expression Control Analysis (PECA). PECA dissects mRNA- and protein-level regulation in time-resolved analyses and allows for consistent comparisons of the two levels of gene expression regulation (Teo et al, 2014). Specifically, it computes the ratio of synthesis and degradation rates over successive time intervals from paired time course data, and transforms mRNA and protein concentrations into statistical measures of regulation, as expressed by rate ratios. The rate ratios are the ratios between synthesis and degradation rates of specific molecules. The rate ratios and their changes across time provide quantitative summaries of gene expression regulation. We can use the PECA model for mRNA expression alone to characterize RNA-level regulation, or in combination with protein data to characterize protein-level regulation.

Compared to experimental measurements of protein synthesis and degradation rates, e.g. pulsed and dynamic SILAC (Doherty et al, 2009; Schwanhauser et al, 2009), PECA has the disadvantage that it currently does not distinguish between molecular synthesis and degradation, but the advantage that it does not require metabolic labeling of the proteins, and can therefore be applied to systems that are not amenable to SILAC. Label-free proteomics approaches are slightly less accurate than those using isotopic labeling, and therefore cannot detect small

fold-changes as sensitively. However, this disadvantage is effectively compensated for by recent technological and computational advances, and easier sample handling that allows for analysis of multiple replicates (Cox et al, 2014; Liu et al, 2013; Schmidt et al, 2014; Tebbe et al, 2015).

Although a few other computational approaches can quantify the rate parameters based on first-order differential equations, e.g. (Jovanovic et al, 2015; Lee et al, 2011; Omranian et al, 2015), PECA is the first approach that introduced a probabilistic model for statistical inference of regulatory parameters. Unlike the alternative approaches, PECA's probabilistic model is formulated based on Bayesian hierarchical models and leads to comparatively stable parameter estimation. More importantly, it provides a statistical score, called change point probability score (CPS), on which one can apply a score threshold associated with a desired false discovery rate (FDR) to extract genes that are significantly regulated at one or both levels. 'Significant regulation' can therefore be defined as a significant change in the rates of synthesis and degradation of a gene between consecutive time intervals. The ability to estimate FDRs provides a unified analysis framework to identify mRNA- and protein-level regulation above the noise level. Using this tool, we can dissect the contribution of regulation activities at each molecular level, resulting in a final, observed protein expression trajectory.

We applied PECA to data from mammalian cells responding to stress of the endoplasmic reticulum (ER). The ER is the major protein folding machinery and therefore highly sensitive to reagents that challenge protein folding, such as dithiothreitol (DTT). The ER stress response plays a crucial role in numerous human diseases, e.g. hypoxia, ischemia/reperfusion injury, heart disease, diabetes, and neurodegenerative diseases such as Alzheimer's and Parkinson's, in which prolonged protein misfolding is detrimental to the cell (Lindholm et al, 2006; Yoshida, 2007). During the early ER stress response, PERK-based phosphorylation of eukaryotic translation initiation factor eIF2 $\alpha$  causes halt of translation (Yan et al, 2002). Despite this general decrease in protein synthesis, several hundreds of mRNA species increase in translation through the presence and regulation of small upstream open reading frames in the 5'UTR (uORFs), for example activating response of transcription factors such as ATF4 and ATF6 (Barbosa et al, 2013; Vatter & Wek, 2004), and active translation of stress-related protein GADD34 (Lee et al, 2009) – resulting in substantial rearrangements of the transcriptome and translome (Ventoso et al, 2012). The activated transcription factors then trigger down-stream events, such as the Unfolded Protein Response (UPR), a major mechanism responsible for the repair and refolding of damaged proteins (Schroder & Kaufman, 2005), entailing substantial proteomic rearrangements, independent of transcription. If repair mechanisms fail, the damaged proteins are ubiquitinated and degraded by the proteasome through an ER-associated degradation pathway (ERAD) or autophagy (Buchberger et al, 2010; Imaizumi, 2007; Vembar & Brodsky, 2008). Prolonged or extreme ER stress, leading to an overload of the repair and degradation machineries, triggers cellular apoptosis (Han et al, 2013; Sano & Reed, 2013). These different pathways - ER stress response, UPR, ERAD, and apoptosis - are well organized in their progression and interaction in the cell – providing an ideal system for studies of the relationship between mRNA and protein expression regulation over time.

Studying mammalian cancer cells in their response to DTT over 30 hours, we detected extensive regulation both at the RNA- and protein-levels. We find that RNA-level regulation tends to be short-lived and stable enough to recover the pre-treatment equilibrium between synthesis and degradation, whereas protein-level regulation is more continuous and establishes a new balance between synthesis and degradation. We also present case studies in which we generate hypotheses on the modes of underlying regulation.

# **Results**

## **Stress treatment triggers a variety of responses across time**

To compare the contributions of the mRNA and protein expression response in a dynamic system, we designed a time course experiment of mammalian cells being subjected to stress of the endoplasmic reticulum (ER). We subjected HeLa cells to 2.5 mM DTT-induced ER stress over a 30h period, sampling at eight time points (0, 0.5, 1, 2, 8, 16, 24, 30 hours)(**Appendix Figure S1**). In this setup, DTT had a half-life of ~4h (**Appendix Figure S2**). We first conducted a number of assays to characterize the cellular phenotype in response to the treatment (**Figures 1A, S3**). For example, since the time course spanned more than one cell doubling of ~24h, we tested how the stress affected cell proliferation, as measured by changes in cell density. The cell density decreased during the first 16 hours, after which it increased, suggesting that a fraction of the cell population underwent apoptosis, while surviving cells proliferated normally (**Figure 1A**, upper panel).

This interpretation was confirmed by assays monitoring cell cycle progression and apoptosis: while apoptosis occurred during the first two hours of the experiment, later time points showed continued division of the majority cells (**Figure 1A**, middle/lower panel; **Appendix Figure S3**). DNA-labeling coupled to flow cytometry showed that apoptosis peaked at 2 hours, with ~45% of cell death. Notably, the sample preparation for the mRNA and protein analysis discarded cellular debris; the results below hence focus on life cells. The same experiment also showed most of the population underwent active mitosis: as expected, most cells were in G1 stage across the entire experiment, and some cells continued DNA synthesis (**Figure 1A** middle panel). This result was confirmed by immunocytochemistry using the anti-Phospho-Histone H3 (Ser10) antibody as a mitosis marker. The stressed and control groups were very similar with respect to distribution across the G2/M checkpoint and the M phase of active cell division (**Figure 1A**, lower panel). In sum, while suffering from a loss of cells during the early phase of the experiment, the surviving cell population continued division throughout the entire time course.

Genome-wide transcriptomic measurements confirmed this view and manifested roughly three phases of the response where concerted changes happened: *early* (<2h), *intermediate* (2 to 8h), and *late* (>8h)(**Figure 1B, Appendix Figure S5**). Genes related to transcription regulation and programmed cell death were significantly up-regulated during the early phase (FDR<0.05). During the intermediate phase, the genes involved in ER stress and UPR were highly expressed, while at the same time, genes related to translation elongation, RNA splicing and transport, and macromolecular complex assembly were suppressed suggesting that stressed cells put basic cellular functions to a halt (FDR<0.05). During the late phase, cells expressed genes involved in protein ubiquitination, lysosome, and glycoprotein and transmembrane protein synthesis indicating recovery of surviving cells (FDR<0.05). The increase in lysosomal proteins is consistent with observations which found that the UPR remodels the lysosome as part of a pro-survival response (Brewer et al, 2008; Elfrink et al, 2013; Ron & Hampton, 2004; Sriburi et al, 2004).

## The integrated transcriptome and proteome is highly dynamic

Next, we conducted large-scale, quantitative proteomics analysis to complement the transcriptomic data. A variety of tests confirmed the quality of the proteomics data, e.g. western blots of selected proteins and analysis of housekeeping genes, and its reproducibility across the two biological replicates (**Appendix Figures S11-S13**). We quantified a total of 3,235 proteins at least once across all time points and replicates, and chose a high-confidence dataset of 1,237 proteins for further analysis with complete time series measurements across both replicates. This high-confidence dataset is comparable in size to that of a recent study (Jovanovic et al, 2015). We also constructed an extended dataset with 2,131 proteins which showed similar results (**Appendix Figure S19**).

The high-confidence dataset was further processed to remove measurement noise and then used for the analyses described below. Protein concentrations spanned about five orders of magnitude (**Appendix Table S1**) which is similar to what other large-scale studies observe (Schwanhauser et al, 2011). Their reproducibility was high ( $R > 0.94$  for seven of the eight time points, **Appendix Figure S10**); the correlation with the corresponding mRNA concentrations was consistent across samples (**Appendix Figure S13**). Heatmaps of the integrated and clustered mRNA and matching protein expression values show that overall expression changes were similar between the two biological replicates (**Figure 2**, **Appendix Figures S5, S9, S14**), but some discrepancies exist. In some cases, peak expression changes occurred at 2 hours in one replicate and at 8 hours in the other. To describe experimental reproducibility, we calculated a Replicate Consistency Measure (RCM) that lists the Pearson correlation coefficient between replicate time series measurements of normalized, log-transformed RNA and protein concentrations. At a total of eight datapoints, a Pearson correlation coefficient  $> 0.7$  corresponds to a  $P\text{-value} = 0.05$ . For example, for GRP78 the RCM is 0.87/0.97, suggesting high reproducibility between the two biological replicates. **Appendix Figure S13** displays the frequency distributions of all RCM values which show a bias towards high values.

In **Figure 2**, we identified several major groups with similar expression changes. For example, genes involved in the general stress response were significantly up-regulated during the intermediate and late phase of the experiment both at the mRNA and the protein-level (**Appendix Figure S14**). Translation-related and mitochondrial genes were down-regulated at the mRNA-level, consistent with a halt in metabolic processes in the stressed cells – however, these proteins were up-regulated at the protein-level.

## A statistical tool identifies hidden regulatory signals

In the results described below, we used the PECA tool to extract regulatory signals from the RNA and protein time series data. First, to illustrate the interpretation of PECA results, we show the example of GRP78 (HSP5A), an ER chaperone induced by ER stress and an important anti-apoptotic, pro-survival component of the UPR (**Figure 3**). The figure displays GRP78's mRNA and protein concentrations and the PECA results with respect to RNA- and protein-level rate ratios and significance (RCM=0.87/0.97). We see that GRP78's mRNA and protein expression patterns across the treatment were very different from each other: mRNA concentrations peaked at 8 hours and declined afterwards, while protein concentrations continuously increased. Similar to the concentration data, RNA rate ratios for GRP78 peaked between two and eight hours and decreased later, while protein rate ratios plummeted in the beginning and elevated to the pre-treatment level throughout the intermediate and late phase, resulting in the continuously rising protein concentration. PECA identified both significant up- and down-regulation of RNA



expression in the early and late phase, respectively, as well as significant protein-level regulation in the late phase of the experiment (FDR<0.05; **Figure 3**, shaded area).

Importantly, PECA identified what was invisible from inspection of concentration data alone: at around 16 hours, RNA expression was significantly down-regulated, but protein concentrations continued to rise. This increase was realized through an up-regulation of protein expression, either through increased translation or protein stabilization, and PECA sensitively identified this regulatory event. Notably, PECA was able to distinguish this up-regulation at the protein level from an increase in protein concentrations that is purely due to constant translation of the existing mRNAs at preceding time points, and define regulation as a significant *change* in synthesis and degradation rates from one time interval to the next. This regulatory event is also an example of the sometimes counterbalancing effects of RNA- and protein-level regulation (discussed below and in **Appendix Figure S16**). Incorporating overall data properties and measurement noise, PECA enabled us to quantify regulatory events and extract them in a systematic and statistically consistent manner. The entire PECA results are provided in the **Appendix Dataset 1**.

## **Protein concentration changes dominate in magnitude, but both regulatory levels contribute equally and concordantly**

Before discussing the overall PECA outcomes, we examine general properties of the integrated mRNA and protein concentration data (**Figure 4A-D**). In general, both protein and mRNA concentrations hardly changed during the early phase of the experiment, but only during the intermediate and late phase and with different dynamics. Consistent with earlier studies (Murray et al, 2004), the transcriptome was comparatively static in our experiment, with average fold-changes of about 1.5 fold. Transcript concentrations diverged maximally from the steady state at eight hours, after which they returned to the original levels. In contrast, protein concentrations continuously diverged from the beginning until the end of the experiment, with much less change during the late phase (**Figure 4**, **Appendix Figure S15**). The magnitude of change was also more pronounced for proteins than mRNAs, illustrated by the average (and range) of expression fold changes which were larger than those for mRNAs (**Figure 4**, **Appendix Table S1**).

To quantify the contribution of the two regulatory levels to the cellular response in this system, we extracted significantly regulated genes by applying a 5% FDR cutoff to the PECA results. **Figure 4E, F** shows the number of significantly regulated genes per time point; **Table 1** summarizes the results in a different manner. Most of the significant RNA-level regulation during the ER stress response occurred during the intermediate and also during the late phase (**Figure 4**, **Table 1**). Regulatory activity, i.e. changing mRNA rate ratios, spiked around the two to eight-hours mark, without additional regulation afterwards: concentrations simply returned slowly back to initial values. A similar overall pattern was also observed for the protein level (**Figure 4**).

**Table 1** shows the numbers of significant regulatory events for one of the replicates, grouped according to phase, level, and direction of the regulation. While most changes occurred between during the intermediate phase, they are consistent across phases, replicates, and for different significance cutoffs (*not shown*). The numbers are symmetrically distributed across **Table 1**, confirming what **Figure 4E, F** indicated: mRNA- and protein-level regulation contribute equally to the overall gene expression changes in this experiment, affecting similar numbers of genes. However, as **Table 1** shows, if a gene was significantly regulated during a specific phase of the response,



this regulation occurred at either the mRNA- or the protein-level, but not at both at the same time; the numbers of genes in each of the square's corners are smaller than those in the middle rows or columns.

Next, we asked if mRNA- and protein-level regulation occurred in a concordant fashion, i.e. in the same direction, or discordantly, i.e. working in opposing directions. One such example is GRP78 (**Figure 3**) for which mRNA expression is down-regulated and protein expression is up-regulated at the 16-hour time point. **Table 1** already indicates that discordant regulation is comparatively rare: only few genes are listed in the lower left and upper right corners of the tables (75 genes in total). Alternative ways to identify discordant regulation confirmed this result, i.e. via filtering for negative correlation between PECA's mRNA and protein rate ratios across both replicates (**Appendix Dataset 1, Appendix Figure S16A,B**). We then further refined this analysis and required not only opposing regulation, i.e. at least one significant regulatory event at the mRNA and one at the protein level, but also constant protein concentrations, i.e. changes smaller than 1.5-fold across both biological replicates. Such a scenario would indicate cases of 'buffering' in which changes in mRNA concentrations are counterbalanced to result in no overall change at the protein level. Three out of the 75 genes passed this additional filtering and are shown in **Appendix Figure S16C**. One of these genes is HSC70 (RCM=0.91/0.09), a chaperone discussed below (**Figure 6A**). Note while HSC70's protein concentration profiles do not correlate between biological replicates, the maximal change in both profiles is still smaller than 1.5-fold. Overall, we conclude that discordant regulation is rare, and most changes occur in coordinated manner between mRNA and protein expression.

## Protein expression regulation reaches a new steady state

After quantifying the overall contributions and direction of the regulatory changes, we set out to examine general temporal patterns of regulation. To do so, we constructed a clustered heatmap of median-centered RNA and protein rate ratios and calculated the average rate ratios across the six largest clusters (**Figure 5**). A stark contrast in coloring between consecutive columns indicates significant regulation of an individual gene: a change in the synthesis and degradation rates results in a change in rate ratios between time intervals. **Figure 5** shows a striking difference between the mRNA and protein level of regulation. For RNA-level regulation, many PECA rate ratios spike during the intermediate phase, resulting in significant changes at both the two- and eight-hours boundary time points. Before and after this interval, mRNA synthesis and degradation rates were relatively constant, with some exceptions during the late phase. We note that the absence of regulation in the early time points is unexpected since, for example, many cells underwent apoptosis within the first two hours – suggesting that these processes may have occurred before our first measurement at 30 minutes. The spike-like or transient behavior of the RNA-level regulation was confirmed both for the extended dataset (2,131 genes) and the entire transcriptome (>18,000 genes) (**Appendix Figures S19, S21**), indicating that the high-confidence dataset delivers representative results. We observe strong spikes in extreme rate ratios between two and eight hours, with significant regulation leading into and out of this phase.

Next, we analyzed the temporal behavior of protein-level regulation during our experiment. Similar to mRNA, little regulation occurred during the early phase, but it rapidly increased during the intermediate phase (**Figure 5**). However, in contrast to the spike-like mode of RNA-level regulation, PECA showed that many protein rate ratios changed only once during the intermediate phase, in a switch-like or permanent manner, but then remained constant. This switch-like behavior is even more apparent when examining the averaged rate ratio changes across the different

gene expression clusters (**Figure 5**, right). After the change at around 2-hours, the protein concentrations did not revert back and stayed at the new level throughout the remainder of the experiment, indicating execution of the same protein synthesis and degradation rates that had been set earlier, without additional regulation. As can be seen in **Figure 5** (right), the switch-like behavior applied to both up- and down-regulation, and was independent of the mode of mRNA regulation. It is also present in the extended dataset (**Appendix Figure S19**). The PECA results confirmed what the concentration data had hinted for: while mRNA expression returned to the original values, protein-level regulation reached a new steady state,

## PECA results help to generate hypotheses on regulatory modes

Finally, we examined three groups of genes in detail to illustrate how our analysis can amplify signals that are otherwise hidden and help to generate hypotheses on possible regulatory modes. The first example group includes GRP78 (HSPA5, BiP; RCM=0.87/0.97) and other chaperones (**Figure 6A**). As discussed above, GRP78's up-regulation at both the mRNA and protein level is expected due to its crucial role during the ER stress response. It is tempting to hypothesize that its strong protein-level up-regulation might be mediated by the Internal Ribosome Entry Site in its 5'UTR. However, the validity of this hypothesis is still debated (Fernandez et al, 2002).

Another gene in this group is HSC70 (HSPA8; RCM=0.91/0.09) which is, similar to GRP78, a chaperone with pro-survival functions in the cell (Zhang et al, 2013). However, its protein expression pattern is different from that of GRP78 in that it remains constant across the time course. HSC70 is constitutively expressed and helps folding of nascent protein chains. Under stress, it has been described to be slightly induced (Liu et al, 2012). In our dataset, we observe a significant drop in mRNA concentrations during the early phase of the experiment and a later recovery. Interestingly, this expression change is not transmitted to protein concentrations, but counter-balanced by significant, transient up-regulation of protein expression. This behavior makes HSC70 one of the three examples for potential buffering discussed above (**Appendix Figure S16**).

Both HSC70, but also HSP90AA1 and HSP90B1 serve as co-chaperones for the HSP90 proteins. HSP90B1 (GRP94, TRA1; RCM=0.90/0.91) is localized to melanosomes and the ER and assists in protein folding. The protein appears to be regulated in two phases. After a short-term transcription increase (followed by transcription decline), protein production is augmented during the intermediate and late phase of the ER stress experiment. Finally, **Figure 6A** shows P58IPK (DNAJC3; RCM=0.88/0.63) which is a member of the Hsp40 chaperone family and an inhibitor of the eIF2  $\alpha$  kinase PERK. Due to this function, it is essential for translation re-start after the initial, ER-stress related translation shutdown (Roobol et al, 2015). An ER stress element in P58IPK's promotor region is known to activate the gene's transcription in response to ER stress (Yan et al, 2002). In our experiment, despite up-regulation at the mRNA level, protein concentrations are constant over the entire time course, suggesting homeostatic down-regulation at the protein level. However, this case did not qualify for buffering according to our criteria. The low P58IPK levels together with the continuous increase in GRP78 concentration (Yan et al, 2002) indicate that an ongoing ER stress response delayed return to normal translation in our experiment.

The second example group comprises 196 genes with invariable RNA concentrations, but whose protein concentrations increased during the late phase (**Appendix Figure S14**, **Appendix Dataset 1**, cluster 8). Genes in this group are enriched in mitochondrial proteins, ATP biosynthesis, ribosomes, translation, and transmembrane proteins (FDR<0.05). The ATP synthase genes are shown in **Figure 6B**. ATP synthases have essential roles in

cellular ATP biosynthesis – and their increased activity likely boosts cellular ATP levels which in turn helps provide the energy needed for the unfolded protein response. We identified eight subunits (ATP5B, C1, D, F1, H, I, L, O; average RCM=0.50/0.61) with similar expression patterns. PECA analysis of these genes shows how our tool can extract an otherwise hidden signal: PECA correctly identified significant positive regulation at the protein level that results in an increase in absolute protein concentrations of the ATP synthase subunits.

To generate hypotheses on possible mechanisms for the up-regulation of these proteins, we collected >160 sequence features, including length, signal sequences, nucleotide composition, amino acid composition, translation regulatory elements, RNA secondary structures, and post-translation modifications (**Appendix Table S2**). When testing this example group for biases across the features, we found significant depletion in proline and glutamic acid which are part of PEST sequences that shorten protein half-lives, and disordered regions, i.e. COILS and REM465 (t-test,  $p < 0.0001$ ), which are also known to destabilize proteins. Depletion in these two characteristics would stabilize the protein and would explain the up-regulated protein expression found by PECA.

The last example group contains 91 genes (**Appendix Dataset 1**, cluster 3) that are characterized by an increase in both mRNA and protein concentrations, and are significantly enriched in oxidoreductases, and interestingly, aminoacyl-tRNA synthetases, namely GARS, YARS, IARS, AARS, SARS, and EPRS (FDR<0.05; average RCM=0.88/0.21). The aminoacyl-tRNA synthetases are shown in **Figure 6C**, and are examined in more detail in **Appendix Figures S17, S18**. A number of the enzymes show a striking gene expression pattern in which protein synthesis is delayed by several hours, compared to RNA synthesis. As this protein synthesis only occurs after mRNA concentrations decrease already, the resulting final protein concentrations remain comparatively constant (**Figure 6C**). Again these cases did not qualify for ‘buffering’ regulation, as they did not pass our filtering criteria.

However, post-transcriptional regulation of aminoacyl-tRNA synthetases has been observed before in other contexts (Chen et al, 2012; Guan et al, 2014; Kwon et al, 2011; Park et al, 2012; Wei et al, 2014). Its cellular role and underlying mechanism remained unknown until a recent publication delivered an intriguing explanation: aminoacyl-tRNA synthetases express alternative splice variants that lack the catalytic domain but which often have additional ‘moonlighting’ functions independent of their original role during translation (Lo et al, 2014). Based on these findings, we hypothesized that the discrepancy between mRNA and protein expression patterns for some genes might be explained by the differential expression of splice variants, and we examined the proteomics data manually for such examples (**Appendix Figures S17, S18**). Unfortunately, as the proteomics experiment had not been designed to detect splice variants, only three enzymes (AARS, IARS, QARS) provided enough information to draw some conclusions. While we detected for each of these three enzymes a set of sequence variants with differential expression, future work will have to confirm if these alternative splicing events are indeed functional and affect the overall, averaged protein expression levels as observed in **Figure 6C**.

## **Discussion**

After much debate on the relative contributions of RNA- and protein-level regulation to set steady-state protein concentrations (Csardi et al, 2015b; Jovanovic et al, 2015; Li et al, 2014b; Vogel et al, 2010; Vogel & Marcotte, 2012), it is time to start examining a new dimension: that of time-resolved expression changes. However, such datasets are still rare, in particular for mammalian cells. Using quantitative proteomics and transcriptomics data of

mammalian cells responding to DTT and a statistical tool specifically designed to analyze time-series protein and RNA measurements, we deconvolute the relative contributions of transcription, translation, and molecule degradation to changes in expression during a 30h time course experiment. Our analysis focuses on changes after the first 30 minutes of the response, yet regulation much before the first half-hour time point have been described (Satpute-Krishnan et al, 2014). We used our statistical tool, PECA, to define expression regulation in a quantitative manner, extracting significantly regulated genes and their corresponding time points. While the major results from this study have been confirmed by analysis of the total transcriptome (**Appendix Figure S21**) and an extended mRNA/protein dataset (**Appendix Figure S19**), our discussions are still restricted to a comparatively small subset of the proteome. However, the use of complete time series data and biological replicates increases our confidence in the validity and generality of our findings.

Overall, the transcriptome in our dataset was comparatively static, consistent with earlier observations (Murray et al, 2004). In contrast, as expected from a treatment that affects the protein homeostasis function of the ER, we found that protein concentrations changed more drastically than those of mRNA. However, despite the smaller RNA concentration changes, we found that mRNA- and protein-level regulation contributed equally to the final expression response (**Table 1**). This finding contrasts reports from steady-state systems in yeast (Csardi et al, 2015a; Li et al, 2014a), but is consistent with a recent study on a dynamic system of mammalian cells responding to lipopolysaccharide (LPS) treatment (Jovanovic et al, 2015). In both the ER stress response described here and the published data on the LPS response, regulation at both RNA and protein level contributes to the change in the system, and protein expression changes drive the synthesis and turnover of highly abundant molecules (**Appendix Figures S22, S23, Tables S1, S3, S4**).

While most changes in concentrations and rate ratios were concordant between mRNA and protein, we also asked if we observed discordance in the dataset, i.e. case in which transcript and protein level regulation act in opposite directions. Some examples of such discordance can be identified in **Table 1**, and we found that they were rare. One example is the ER stress related chaperone GRP78, whose mRNA concentration is in decline at 16 hours, while protein concentrations still increase (**Figure 3**). We find that discordance at a specific time point is often resolved by a simple delay in the response: the changes at the RNA level are initially counteracted by the protein level response, but later supported by concordant action. Overall, true ‘buffering’ appears to be the exception, and most regulatory events are coordinated between the mRNA and protein level.

Most strikingly, we find that the mRNA- and protein-level regulation during the ER stress response, while equal with respect to number of significant genes (FDR<0.05), presented itself via different temporal patterns. mRNA concentrations responded in a ‘pulse-like’ fashion, transiently coordinating changes in RNA concentrations which returned to original values by the end of the 30-hour measurement. In comparison, protein regulation altered in a ‘switch-like’ manner, permanently changing to a new steady-state that was different to the original state. We note that without higher temporal resolution it is impossible if such a switch is indeed very rapid or more continuous over a period of time.

We aimed to estimate the generality of these findings by re-analyzing the published dataset on the LPS response with PECA (**Appendix Figure S22, S23, Tables S3, S4**)(Jovanovic et al, 2015). This re-analysis confirmed that the LPS response is driven by substantial RNA regulation immediately after stimulation (Jovanovic et al, 2015). However, we also found that the changes in protein concentrations were not entirely accounted for by RNA

regulation alone: the rates of translation and protein degradation also changed significantly and fine-tuned the final protein concentrations. Again, we observed a spike- and switch-like behavior similar to that of the ER stress response, suggesting transient and permanent regulatory changes, respectively. However, in contrast to the ER stress response in which proteins appeared to switch from the original to a new steady state, in the LPS response we found the switch-like behavior for RNA-level regulation. Given that the LPS response is driven largely by transcription, while the ER stress response strongly affects the proteome, we hypothesize that the switch-like regulatory patterns occur in the dominant level of regulation to foster major, and perhaps permanent changes of the cellular state. Future work will have to test the validity of this hypothesis.

Mapping a set of sequence and experimental datasets to groups of proteins with similar expression patterns, we generated hypotheses on the differential regulation of these genes. Interestingly, for a set of genes with significant up-regulation at the protein level without matching changes at the mRNA level (e.g. example group two, **Figure 6B**), we found depletion of destabilizing signatures such as PEST signals or disordered regions. This depletion suggests that sequence evolution and the dynamic response to a stimulus operate cooperatively, enabling accumulation of proteins under stress.

This example group was also enriched in specific protein functions, e.g. mitochondrial ATP synthases, which offer another intriguing interpretation for their differential regulation. Mitochondrial proteins, such as ATP synthases, are thought to be preferentially translated near the organelle (Margeot et al, 2005; Rak et al, 2011; Smits et al, 2010) and indeed, when examining published data on localized translation in yeast, we find that many yeast orthologs of the ATP synthase complex are translated near the mitochondria (Williams et al, 2014)(*not shown*). This localized translation differs from cytoplasmic translation and occurs in several biological processes, e.g. ejaculated sperm (Gur & Breitbart, 2008; O'Brien, 2003). RNAs encoding mitochondrial proteins account for almost 30% of localized translation and produce proteins with functions in the mitochondrion (Deglincerti & Jaffrey, 2012). We hypothesize that the mitochondrial vicinity may counterbalance the redox imbalance caused by the DTT treatment in our experiment and enable translation – while protein synthesis is repressed in the remainder of the cytosol (Liang et al, 2013; Venditti et al, 2013; Wallace et al, 2010). Continued expression of ATP synthase genes in turn would enable the cells to provide the vast amounts of energy needed to sustain the stress response.

In sum, both technology and statistical tools to analyze time series transcriptomic and proteomic measurements have advanced enough to allow for first insights into the dynamics of gene expression regulation. In this work, we have demonstrated that protein misfolding stress places much greater weights on the importance of protein-level regulation than the recent observations that characterized transcriptomic changes as the main driver of phenotypic adaptation (Lee et al, 2011; Jovanovic et al, 2015). We also demonstrated that, in our experiment, mRNAs and proteins are regulated with different temporal patterns, with the dominant protein response adhering to a switch-like behavior that establishes a new steady state in the cell. We therefore suggest that the way RNA- and protein-level regulation determines the post-treatment homeostatic condition depends on the nature of treatment and its implications on the fitness of the cells, i.e. stress conditions versus stimulation. The debate on the relative contribution of transcriptomic and post-transcriptional regulation will have to be continued in a context-specific discourse with systematic comparisons of various conditions.



# **Methods**

## **Cell culture and experimental setup**

HeLa cells were cultured in DMEM (Sigma) with 10% fetal bovine serum (Atlanta biologicals) and 1X penicillin streptomycin solution (Corning cellgro) at 37°C and 5% CO<sub>2</sub>. At approximately 60% confluency, dithiothreitol (DTT) at 2.5 mM concentration was added to induce stress for different periods of time, i.e. 0, 0.5, 1, 2, 8, 16, 24, and 30 hours. To account for different cellular ages at harvest, the experiment was conducted so that the experiment started with the 30h treatment period, and the cells were then collected at the same time (**Appendix Figure S1**). This protocol ensured that all cells grew for the same time period.

## **Cell counting**

The cells were seeded in parallel plates three days before sample preparation, and trypsin digested from the plates using 0.5% trypsin for 2 min. We used Trypan blue (GIBCO, Life Technologies, USA) to label living cells and count them using a haemocytometer. The cells were treated with 2.5 mM DTT at designed time points, collected and counted. The assay was conducted in triplicate, and the average and standard deviation were calculated for final results.

## **DNA staining and flow cytometry**

The control and stressed cells were digested from plates with 0.5% trypsin, and prepared as single cell suspensions in 1X Dulbecco's Phosphate Buffered Saline (DPBS) solution. The cells were then fixed and permeabilized with 70% ethanol for 2 hours at 4°C. At this step, the fixed cells can be kept at 4°C for up to 4 weeks. For flow cytometry analysis, we rehydrated cells in DPBS and incubated with RNaseA (ribonuclease A, 19101, QIAGEN) for 30min at 37°C to digest cellular RNA and thus decrease background RNA staining. After RNaseA treatment, the fluorescent molecule propidium iodide (PI) was added into the cell suspension at 50 µg/ml concentration and incubated for 30min at room temperature to bind DNA unspecifically. We quantified cells with stained DNA by flow cytometry analysis on an FL2 flow cytometer with 488nm laser excitation. The assay was conducted in duplicate.

## **Immunocytochemistry**

The cells were cultured on glass cover slips in cell culture dishes with conditions identical to those described above, DTT treated and fixed with fresh 4% paraformaldehyde for 10 min. The fixed cells were pre-incubated in 0.1 M DPBS containing 10% normal donkey serum and 0.2% Triton X-100. Condensed nuclear DNA, a mitosis marker, was labeled with anti-Phospho-Histone H3 (Ser10) antibody (06-570, EMD Millipore, MA, USA). The primary antibody incubation was at 4°C overnight in the medium containing 5% normal donkey serum, 0.2% Triton X-100 and 1% bovine serum albumin. After washing with PBS, the binding sites of the primary antibodies were revealed by incubating for 2 h at 4°C with the secondary antibody, rhodamine red-X (RRX) conjugated donkey anti-rabbit IgG. We then mounted the samples by ProLong Gold antifade reagent with DAPI (P36935, Life Technologies, OR, USA), and scanned them with a Leica SP5 confocal laser scanning microscope (CLSM, Leica, Mannheim,

Germany). To avoid reconstruction stacking artifacts, RRX and DAPI were evaluated by sequential scanning of single-layer optical sections.

## Transcriptomics measurements

To estimate absolute mRNA expression values, we used Agilent-028004 SurePrint G3 Human GE 8x60K microarrays. RNA extraction was conducted using Trizol (Sigma) followed by use of phase separation using the PhaseLock Gel-Heavy (5-Prime, manufacturer's protocol). We then purified RNA using the RNA MinElute Kit (QIAGEN) and a Nanodrop ND-1000 to quantify RNA. Cyanine-3 (Cy3) labeled cRNA was prepared from 50 ng RNA using the One-Color Microarray-Based Gene Expression Analysis (Low Input Quick Amp Labeling) Protocol (Agilent) according to manufacturer's instructions, followed by RNeasy column purification (QIAGEN). Dye incorporation and cRNA yield were estimated with NanoDrop. We fragmented 600 ng of Cy3-labelled cRNA at 60°C for 30 minutes in a reaction volume of 25 µl containing 1x Agilent fragmentation buffer and 2.5x Agilent blocking agent following the manufacturer instructions. Upon completion of the fragmentation reaction, we added 25 µl of 2x Agilent hybridization buffer to the fragmentation mixture and hybridized to Agilent Whole Human Genome Oligo Microarrays (G4112A) for 17 hours at 65°C in a rotating Agilent hybridization oven. After hybridization, microarrays were washed for one minute at room temperature with GE Wash Buffer 1 (Agilent), for one minute at 37°C with GE Wash buffer 2 (Agilent), and for 10 seconds in acetonitrile. Slides were scanned immediately after washing using the Agilent DNA Microarray Scanner (G2565CA) with one color scan setting for 8x60k array slides (Scan Area 61x21.6 mm, Scan resolution 3 µm). The scanned images were analyzed with Feature Extraction Software 10.7.3.1 (Agilent) using default parameters (protocol GE1\_107\_Sep09 and Grid: 028004\_D\_F\_20110819). To confirm the accuracy of the transcriptomics experiments, selected time points were compared to data collected from the same samples, but using RNA-seq (**Appendix Figure S8**).

## Transcriptomics data processing and quality control

Upon data collection, probeset identifiers were mapped to Ensembl transcript and gene identifiers, and intensity data was averaged to obtain one value per gene. The data was then log transformed (natural base) and quantile normalized. We devised a jackknife procedure to remove aberrant expression measurements. In the procedure, one data point was removed at a time and the total range of variation (TRV), defined as the difference between maximum and minimum, for the remaining dataset was recorded. After following this procedure for all data points, the ratio of the median TRV to the minimum TRV was calculated and used as a measure of 'spikiness' (or noisiness) of the data. The larger the TRV, the noisier the gene. After examining the histogram of the TRV values across all genes (*not shown*), the threshold for tolerance level was set to 3 from the histogram of TRV values across *all* genes, and genes below the threshold were retained. These strict filtering rules enable construction of a high-confidence dataset albeit possibly removing true signal. Finally, locally weighted scatter plot smoothing (Lowess) was applied to further smooth the filtered data for robust estimation of kinetic parameters in the PECA model. To do so, we used the *lowess* function in R, a standard implementation of local weighted scatter plot smoothing, with the default parameter settings. We manually inspected the extend of smoothing: the large majority of time course profiles changed very little, except for those with zig-zag patterns between time points. **Appendix Dataset 4** shows the original and post-processed data. The final mRNA expression data for the two replicates are shown in **Appendix Figure S5**. As described in the Results and **Appendix**, several tests, e.g. comparison to RNA-sequencing data,



validated the accuracy of the transcriptome data (**Figures S6, 7**). All transcriptomics data are deposited in the NCBI GEO database, with the identifier GSE67901.

## Proteomics experiments

We collected cell pellets for each sample and Dounce homogenized the cells in lysis buffer containing 10 mM KCl, 1.5 mM MgCl<sub>2</sub>, 0.5 mM DTT and 1X protease inhibitor cocktail (cOmplete, Mini, EDTA-free Protease Inhibitor Cocktail Tablets in EASYpacks, Roche) in 10 mM Tris-HCl (pH 8.0). Samples were kept on ice throughout the entire procedure. Cell lysate was centrifuged at 1,000 x g at 4 °C; the supernatant was saved as the cytosolic fraction, and the pellet was subjected to a single purification step via a sucrose cushion of 0.25 M and 0.88 M sucrose. We determined protein concentrations using the Bradford Protein assay (Bio-Rad) and diluted samples to 2mg/ml concentration. For each sample, we mixed 50ul with equal volume of trifluoroethanol, added 15 mM DTT and incubated at 55 °C for 45 min. Next, samples were alkylated with 55 mM Iodoacetamide (IAA) for 30min at room temperature in the dark. We then digested the protein mixture over night with mass spectrometry grade trypsin (Promega; at 1:50 v/w) at 37 °C. Tryptic digestion was halted by adding 2% formic acid (FA) and purified with C18 spintips (Thermo Scientific, HyperSep). The sample was stored at -80 °C until LC-MS/MS analysis.

## LC-MS/MS Analysis

Peptides were separated by reverse phase nanoflow high-performance liquid chromatography (nano-HPLC) and quantified on an LTQ-Orbitrap Velos mass spectrometer (Thermo Scientific). Data-dependent analysis was performed at a resolution of 60,000 and with the top 20 most intense ions selected from each MS full scan, with dynamic exclusion set to 90 s if m/z acquisition was repeated within a 45 s interval. In each scan cycle, the top 20 fragmentation spectra were acquired in the collision-induced dissociation mode. For peptide separation, we used an Agilent ZORBAX 300SB-C18 reverse phase column (150 mm x 75  $\mu$  m inner diameter) and a 240 min gradient of 2 to 90% acetonitrile and 0.1% formic acid. We conducted the experiment twice (biological replicates) and collected four technical replicates for each sample (repeat mass spectrometry measurements). The data for technical replicates were combined during the computational analysis (see below), while the biological replicates were kept separately.

## Proteomics data processing and quality control

Raw data were processed using the MaxQuant software (1.3.0.3) (Cox and Mann, 2008) and peak lists were searched with Andromeda (Cox et al., 2011) against a database containing the translation of all predicted proteins listed in UniProt (2012), and a list of commonly observed contaminants supplied by MaxQuant. Protein identification was performed using 20 ppm tolerance at the MS level (FT mass analyzer) and 0.5 Da at the MS/MS level (Ion Trap analyzer), with a posterior global FDR of 1% based on the reverse sequence of the human FASTA file. Up to two missed trypsin cleavages were allowed, and oxidation of methionine and N-terminal acetylation were searched as variable post-translational modification; cysteine carbamidomethylation as fixed. The minimal required peptide length was set to seven amino acids and both protein. The minimum number of peptide pairs used for quantitation was set to one. We used MaxQuant to combine the cytosolic and pellet samples as different fractions in the same experiment, after testing different options (**Appendix Figure S8**). We used label free quantification (LFQ) with minimum ratio count set to 1. Using only one peptide for quantitation can potentially lower quantitation

accuracy; however, due to the time-series nature of the experiment, we were able to account for this additional variation by examination of all data points across a time series and removal of noise (see below). As is expected from complex proteomes such as that from mammalian cells, peptides can be shared between homologous proteins or splice variants, leading to ‘protein groups’. The protein group structure is shown in MaxQuant’s *proteinGroups.txt* file in the **Appendix Dataset 3**; for clarity, we refer to the first and main protein from each group throughout the text.

We quantified a total of >3,200 proteins, of which 2,828 mapped to the RNA data. To derive a high-confidence dataset, we removed all genes with one or more missing data points, resulting in 1,820 genes for further processing. This dataset was normalized by the sum of all LFQ intensities, where the sum excluded the top 5% intensities in each sample. Removing the top 5% most intense proteins from the summation can prevent extremely abundant proteins (and potential outliers) from dominating the normalizing factor. The data was then log transformed (natural base) and the jackknife procedure was applied to remove outliers (i.e. spikes) in the data, similar to what was described above for the transcriptomics data. The TRV threshold was 2 upon examination of the histograms of all TRVs (*not shown*). Subsequently, we applied weighted local regression (Lowess) to further smooth the time course data. A total of 1,237 genes were left in final dataset with complete and post-processed, high-confidence mRNA and protein annotations for two replicates across eight time points.

To evaluate the generality of our results, we constructed an extended dataset comprising 2,131 proteins. This dataset proteins with up to two missing values across the proteomics data which were imputed using Gaussian Processes. **Appendix Figure S19** describes details of this analysis and the results, which were consistent with those from the high-confidence dataset. All proteomics data are publically available from the ENSEMBL PRIDE database, identifier PXD002039. The original ‘txt’ folder of MaxQuant output files are provided as an **Appendix Dataset 3**. Several tests, e.g. western blotting, validated the quality of the proteomics data as described in the Results and **Appendix (Figures S11, 12)**.

## Hierarchical clustering and cluster analysis

Expression data was clustered using Perseus version 1.4.1.3. ([http://141.61.102.17/perseus\\_doku](http://141.61.102.17/perseus_doku)), with default settings, i.e. we used ‘correlation’ and ‘average linkage’ as the distance measures and clustering algorithm, respectively. Using a 0.604 distance threshold, the combined RNA and protein data was divided into 25 clusters. Clusters with more than 30 genes were chosen for function enrichment analysis using the NCBI DAVID tool (Huang et al, 2009a; Huang et al, 2009b). Significantly enriched GO terms were chosen based on FDR<0.05. The **Appendix Dataset 2** contains all GO term enrichments.

For further cluster analysis, we assembled 164 sequence features from various databases and tools (**Appendix Table S2**). These features include characteristics that affect RNA and protein evolution, localization, synthesis and degradation. Student t-test and hypergeometric tests were conducted to calculate the enrichment of each sequence features in any subset of genes. Bonferroni correction for multi-hypothesis testing was included to set the cut off p-value.

## Protein Expression Control Analysis

To quantify the RNA- and protein-level expression regulation, we performed protein expression control analysis (PECA)(Teo et al, 2014). As described in the original publication, PECA constructs a probabilistic model for the kinetic parameters governing the synthesis and degradation of an outcome molecule ( $Y$ ) given the precursor molecule data ( $X$ ). Specifically, the model estimates the ratio of synthesis and degradation over each time period given the data of  $X$  and  $Y$  at the beginning and end of each time period, and also computes the posterior probability that the rate ratio has changed between two adjacent time periods given the paired data ( $X,Y$ ) at three consecutive time points (two time periods). This probability, called the change point score (CPS), is then used to estimate the overall false discovery rate of regulation change events across all genes.

Since the raw data suggested that there are discordant expression patterns between the two biological replicates, we fitted the PECA model for each replicate separately. We then performed the RNA- and protein-level analyses separately. In the RNA-level analysis, we assumed that large-scale genomic changes such as those in ploidy have not occurred as a result of the ER stress within 30 hours, and created an artificial DNA copy number data as the precursor molecule (variable  $X$  in the PECA model), with the RNA data as the outcome (variable  $Y$  in the model). We then estimated the ratio of the rates of RNA synthesis (transcription) and RNA degradation for each gene and computed the posterior probability that each intermediate time point is a change point where the rate ratio significantly changes (0.5, 1, 2, 8, 16, 24 hours). In the protein-level analysis, we used RNA data as the precursor molecule ( $X$ ) and protein data as the outcome ( $Y$ ), where the ratio of translation and protein degradation was the kinetic parameter of interest for each protein along with their change point probability as described above.

To summarize the RNA-level and protein-level regulation changes across the three phases, we extracted the maximum CPS score in each phase and considered a gene as significantly regulated during the respective phase if the score was above the thresholds associated with  $FDR < 0.05$ . At this FDR, the CPS score thresholds for ‘significant’ RNA- and protein-level regulation were 0.898 and 0.901 in the first replicate respectively, and 0.890 and 0.898 in the second replicate. Genes were clustered using agglomerative clustering of the combined RNA/protein concentration data, followed by the dynamic tree cut algorithm (Langfelder et al, 2008). The six largest clusters as determined above were mapped to the data (**Figure 5**).

## Conflict of Interests

The authors declare that they have no conflict of interest.

## Author contributions

C.V. and H.C. perceived the idea of the study and designed the experiments. Z.C. and G.T. performed the experiments and analysis steps. S.K., T.M.R. and H.W.L.K. contributed to parts of the study. Z.C., G.T., C.V., and H.C. wrote the paper.

## **Acknowledgements**

We thank Rebecca Bish for help with the work. We acknowledge funding by the NYU Whitehead Fellowship (C.V.), and the NIH R01 GM113237 (C.V., Z.C., H.C. and G.T.).

# **Appendix**

## **Appendix Notes**

Additional figures, tables, descriptions, methods, and discussion.

## **Appendix Dataset 1**

Input and result datasets.

## **Appendix Dataset 2**

GO annotations of major clusters of genes as discussed in the text.

## **Appendix Dataset 3**

MaxQuant output files with parameter settings and peptide and protein based information.

## **Appendix Dataset 4**

PDF of the gene expression profiles, before and after normalization/filtering/smoothing. Dotted lines indicate the original values.

## **Figures / Tables**

### **Figure 1. Cells undergo a complex response to DTT treatment**

While a proportion of cells was apoptotic during the first two hours of the experiment, the majority of the cells continued cell division and displayed an extensive ER stress response.

**A.** We estimated the degree of active cell division based on the cell density changes, the distribution of the DNA content, and the degree of active mitosis. Top panel: Bar graphs show numbers of life cells, with mean and standard deviations. Black lines – DTT treatment time. Middle panel: Quantitative analysis of cell cycle phases by flow cytometry using propidium iodide staining of DNA for cells treated with DTT for different periods of time. The 2N, 4N peaks and S phase plateau were observed in all time points, suggesting active cell division. Bottom panel: Immunofluorescence experiments show mitotic nuclei in red (anti-phospho-Histone H3 (Ser10) antibody), and other nuclei in blue (DAPI). Mitotic nuclei were observed throughout the entire experiment. The ratio between the number of mitotic and all nuclei was similar among all the stress phases (*not shown*). White arrows - apoptotic nuclei. All experiments were performed in triplicate. The complete data are in **Appendix Figure S3**.

**B.** Summary of function enrichment of mRNA expression changes (FDR<0.05, \*, \*\*, and \*\*\* with p-values <0.001, <0.0001, and <0.00001, respectively). The corresponding expression data are shown in **Appendix Figure S5**. While some apoptosis occurred, remaining cells underwent intense unfolded protein and ER stress response.

A.

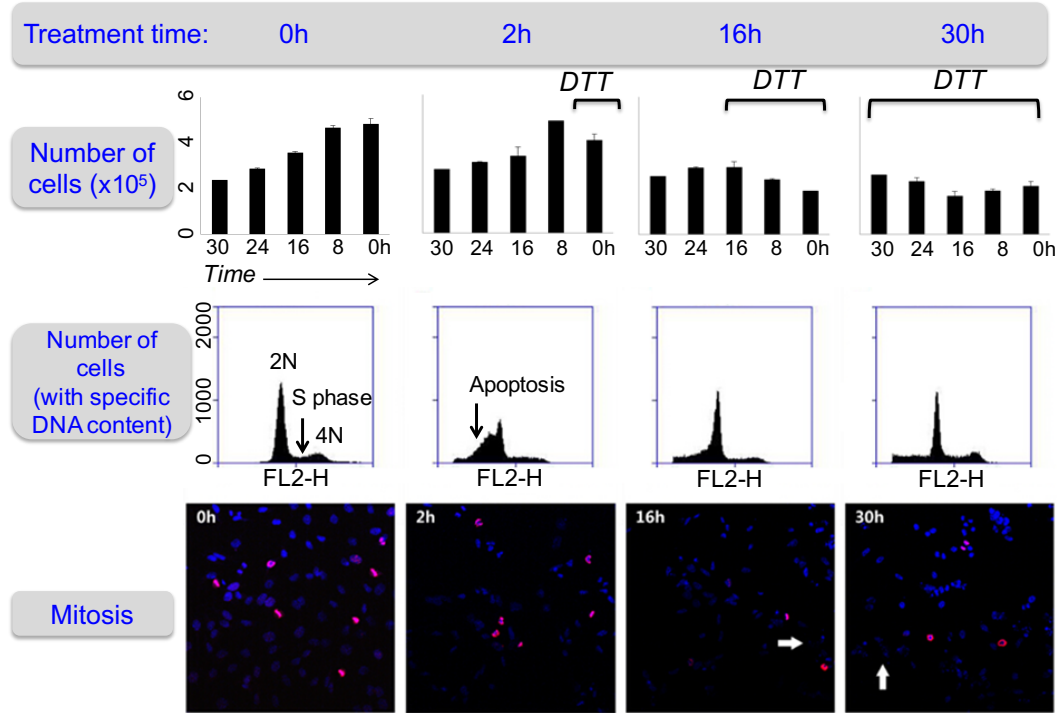

B.

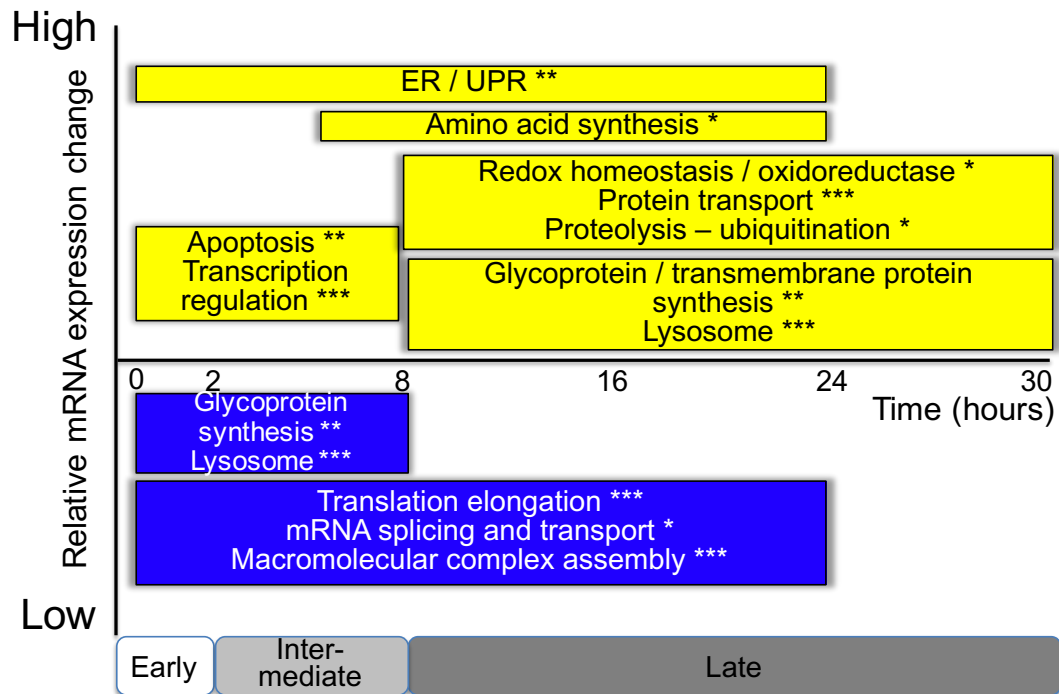



## Figure 2. RNA and protein expression changes are highly dynamic

The heatmap shows the normalized, relative expression values for both mRNA and protein measured across two replicates (N=1,237), log transformed (base 10). Profiles were clustered as described in the Methods; the cluster definitions are provided in **Appendix Dataset 1**. Bottom panels E, I, L mark the early, intermediate, and late phase, respectively.

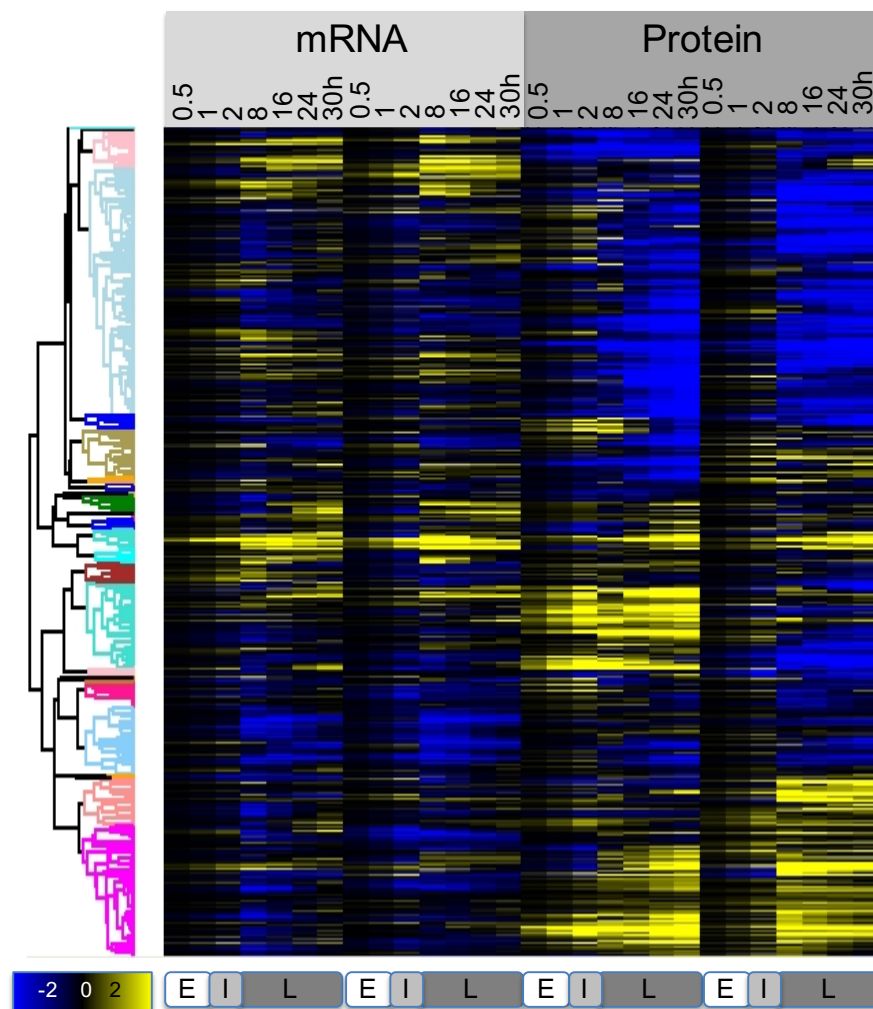

### Figure 3. PECA deconvolutes expression data to extract regulatory information at the RNA and protein level

The example shows the chaperone GRP78, a key ER stress protein. mRNA and protein concentrations are shown on the left; PECA results are shown on the right for RNA- and protein-level, respectively. Intervals with significant regulation as determined by PECA are grey shaded (FDR<0.05). The value of PECA is illustrated at the 16 hours time point at which mRNA concentration decreases, while protein concentration still rises. PECA highlights that there is significant RNA- and protein-level regulation around this time point – a signal that would have otherwise likely have been overlooked.

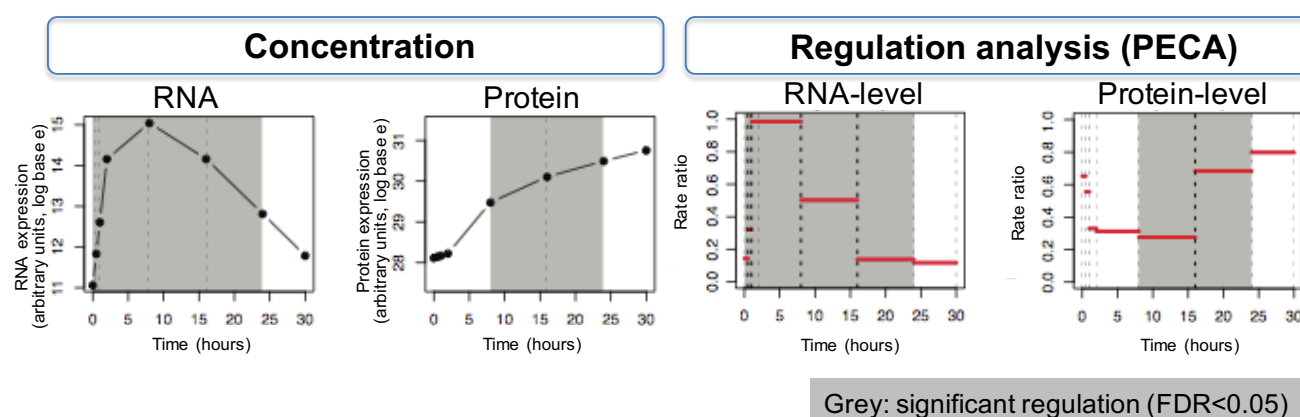

## Figure 4. The proteome response is dominant during ER stress

The concentrations diverge more strongly in the protein data compared to the mRNA data with respect to magnitude (A-D), but both mRNA and protein show similar numbers of significantly regulated genes (E, F). A, B. Correlation (Pearson's  $R^2$ ) between normalized, absolute expression values at time 0 and the respective time points. C, D. Average fold-change (log base 10) and standard deviation of normalized, relative expression values. E, F. The number of significantly regulated genes as determined by PECA (FDR<0.05). We summarized the CPS probabilities of each gene by choosing the maximum probability across the time points in each of the three phases which allows us to characterize how expression regulation (rate ratio) has shifted phase by phase. Panels E, I, L mark the early, intermediate, and late phase, respectively.

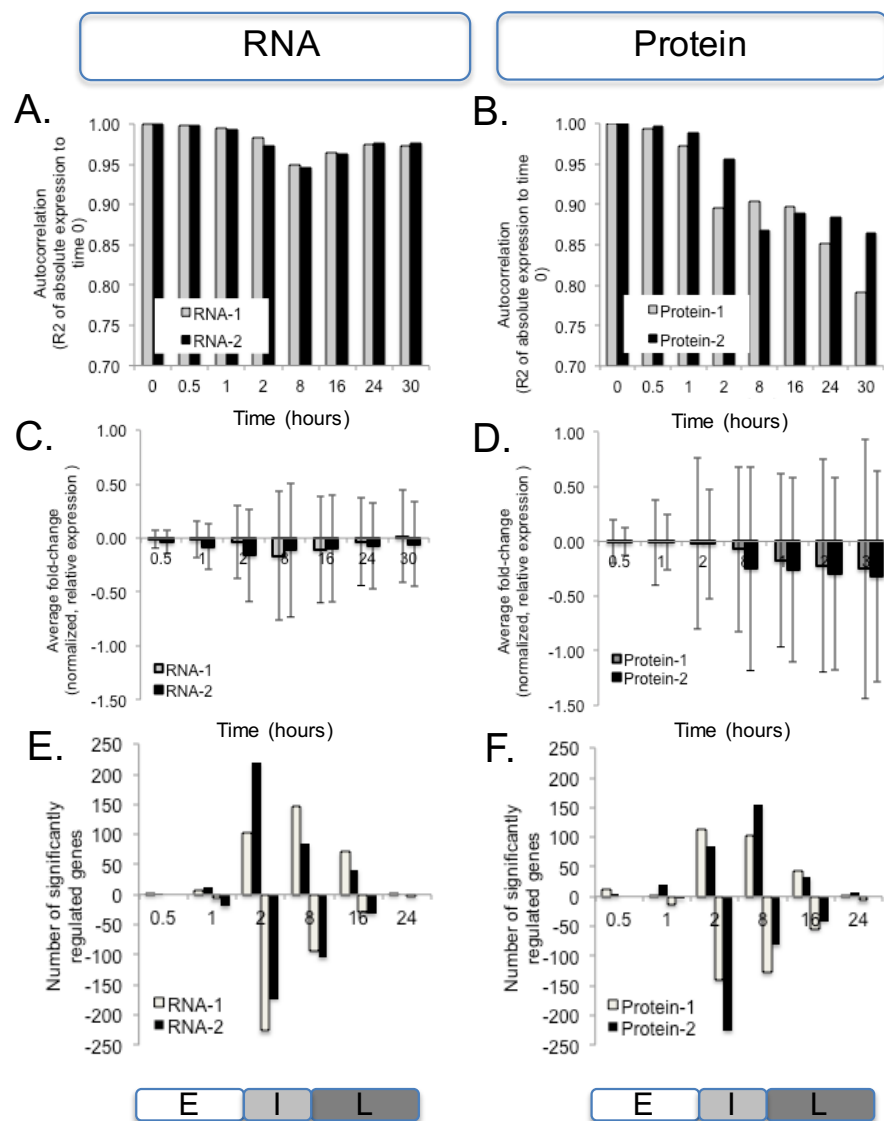

## Figure 5. RNA- and protein-level regulation have different temporal modes

The predominant regulatory level, that of protein synthesis and degradation, shows a switch-like behavior that leads to a new steady state. A. Heatmap of RNA and protein rate ratios as computed by PECA, shown for the two replicates. B. The average rate ratios across six major clusters for both RNA (top) and protein (bottom). RNA rate ratios show a spike during the intermediate phase, while protein rate ratios change only once around the two-hours mark, and remain at the new steady-state level throughout the remainder of the experiment. The clusters are defined in **Appendix Dataset 1**.

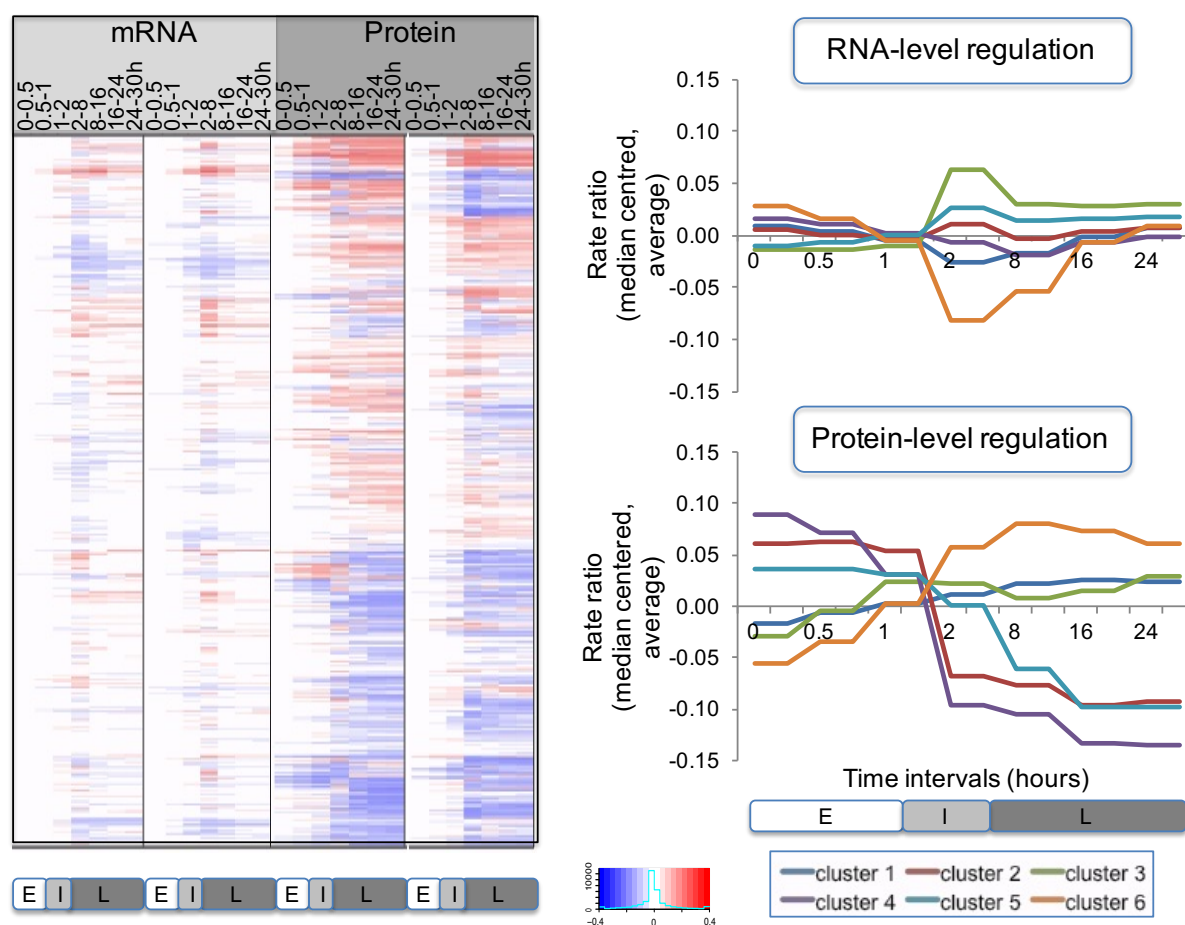

## Figure 6. PECA identifies groups of similarly regulated genes

mRNA and protein concentrations are shown on the left; PECA results are shown on the right for RNA- and protein-level, respectively. **A.** Five chaperones, including GRP78, with mixed expression patterns. **B.** Eight subunits of ATP synthases observed in the experiment with mostly invariable RNA concentrations, and increasing protein concentrations. PECA amplifies the hidden signal, and identifies significant protein-level regulation. **C.** Six aminoacyl-tRNA synthetases whose mRNA concentration increases temporarily, but the protein concentrations remain largely constant. PECA deconvolutes the two opposing regulatory effects that act at the RNA- and protein-level.

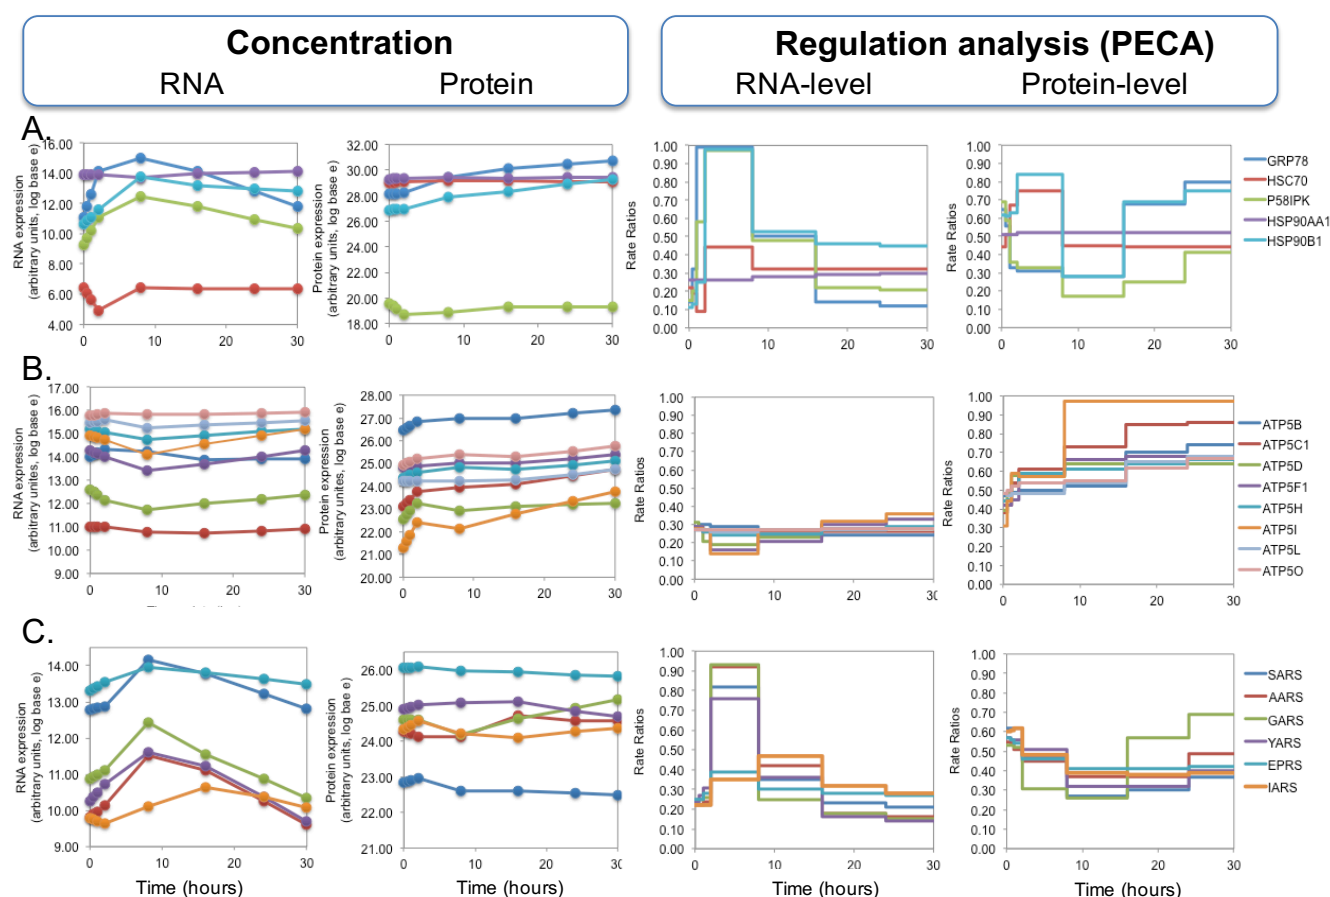

**Table 1. RNA- and protein-level regulation contribute equally to gene expression**

Using PECA, we extracted genes that are significantly regulated at the RNA-, the protein-level, at both levels or neither (FDR<0.05). The tables group these genes into the three different phases ('Early', 'Intermediate', 'Late'), and distinguish between up- and down-regulation, marked by 'Up' and 'Down', respectively. Most changes occur during the intermediate phase. The distribution of the numbers across the tables is symmetric, indicating that mRNA- and protein-level regulations are equally important.

| Protein |      | Early |    |      |      |    |      | Late |    |      | Scale |
|---------|------|-------|----|------|------|----|------|------|----|------|-------|
| RNA     | Down | None  | Up | Down | None | Up | Down | None | Up | >500 |       |
| Down    | 0    | 7     | 0  | 26   | 180  | 21 | 35   | 63   | 16 | >200 |       |
| None    | 13   | 1194  | 15 | 99   | 726  | 83 | 116  | 728  | 94 | >50  |       |
| Up      | 0    | 8     | 0  | 15   | 77   | 10 | 23   | 138  | 24 | >20  |       |
|         |      |       |    |      |      |    |      |      |    | >0   |       |

# **References**

- Barbosa C, Peixeiro I, Romao L (2013) Gene expression regulation by upstream open reading frames and human disease. *PLoS genetics* **9**: e1003529
- Berry DB, Gasch AP (2008) Stress-activated genomic expression changes serve a preparative role for impending stress in yeast. *Mol Biol Cell* **19**: 4580-4587
- Brewer JW, Bommasamy H, Sriburi R, Jackowski S (2008) Membrane biogenesis induced by the unfolded protein response. *Faseb Journal* **22**
- Buchberger A, Bukau B, Sommer T (2010) Protein quality control in the cytosol and the endoplasmic reticulum: brothers in arms. *Molecular cell* **40**: 238-252
- Chen SJ, Wu YH, Huang HY, Wang CC (2012) *Saccharomyces cerevisiae* possesses a stress-inducible glycyl-tRNA synthetase gene. *PloS one* **7**: e33363
- Cox J, Hein MY, Lubner CA, Paron I, Nagaraj N, Mann M (2014) Accurate proteome-wide label-free quantification by delayed normalization and maximal peptide ratio extraction, termed MaxLFQ. *Mol Cell Proteomics* **13**: 2513-2526
- Csardi G, Franks A, Choi DS, Airolidi EM, Drummond DA (2015a) Accounting for experimental noise reveals that mRNA levels, amplified by post-transcriptional processes, largely determine steady-state protein levels in yeast. *PLoS Genet* **11**: e1005206
- Csardi G, Franks A, Choi DS, Airolidi EM, Drummond DA (2015b) Accounting for Experimental Noise Reveals That mRNA Levels, Amplified by Post-Transcriptional Processes, Largely Determine Steady-State Protein Levels in Yeast. *PLoS genetics* **11**
- Deglincerti A, Jaffrey SR (2012) Insights into the roles of local translation from the axonal transcriptome. *Open Biol* **2**
- Doherty MK, Hammond DE, Clague MJ, Gaskell SJ, Beynon RJ (2009) Turnover of the human proteome: determination of protein intracellular stability by dynamic SILAC. *J Proteome Res* **8**: 104-112
- Elfrink HL, Zwart R, Baas F, Scheper W (2013) Inhibition of endoplasmic reticulum associated degradation reduces endoplasmic reticulum stress and alters lysosomal morphology and distribution. *Mol Cells* **35**: 291-297
- Fernandez J, Yaman I, Sarnow P, Snider MD, Hatzoglou M (2002) Regulation of internal ribosomal entry site-mediated translation by phosphorylation of the translation initiation factor eIF2alpha. *The Journal of biological chemistry* **277**: 19198-19205



Fournier ML, Paulson A, Pavelka N, Mosley AL, Gaudenz K, Bradford WD, Glynn E, Li H, Sardi ME, Fleharty B, Seidel C, Florens L, Washburn MP (2010) Delayed correlation of mRNA and protein expression in rapamycin-treated cells and a role for Ggc1 in cellular sensitivity to rapamycin. *Molecular & cellular proteomics : MCP* **9**: 271-284

Guan BJ, Krokowski D, Majumder M, Schmotzer CL, Kimball SR, Merrick WC, Koromilas AE, Hatzoglou M (2014) Translational control during endoplasmic reticulum stress beyond phosphorylation of the translation initiation factor eIF2alpha. *The Journal of biological chemistry* **289**: 12593-12611

Gur Y, Breitbart H (2008) Protein synthesis in sperm: dialog between mitochondria and cytoplasm. *Molecular and cellular endocrinology* **282**: 45-55

Han J, Back SH, Hur J, Lin YH, Gildersleeve R, Shan J, Yuan CL, Krokowski D, Wang S, Hatzoglou M, Kilberg MS, Sartor MA, Kaufman RJ (2013) ER-stress-induced transcriptional regulation increases protein synthesis leading to cell death. *Nature cell biology* **15**: 481-490

Huang DW, Sherman BT, Lempicki RA (2009a) Bioinformatics enrichment tools: paths toward the comprehensive functional analysis of large gene lists. *Nucleic acids research* **37**: 1-13

Huang DW, Sherman BT, Lempicki RA (2009b) Systematic and integrative analysis of large gene lists using DAVID bioinformatics resources. *Nat Protoc* **4**: 44-57

Imaizumi K (2007) Autophagy is activated for cell survival after ER stress. *J Pharmacol Sci* **103**: 45p-45p

Jovanovic M, Rooney MS, Mertins P, Przybylski D, Chevrier N, Satija R, Rodriguez EH, Fields AP, Schwartz S, Raychowdhury R, Mumbach MR, Eisenhaure T, Rabani M, Gennert D, Lu D, Delorey T, Weissman JS, Carr SA, Hacohen N, Regev A (2015) Immunogenetics. Dynamic profiling of the protein life cycle in response to pathogens. *Science* **347**: 1259038

Kwon NH, Kang T, Lee JY, Kim HH, Kim HR, Hong J, Oh YS, Han JM, Ku MJ, Lee SY, Kim S (2011) Dual role of methionyl-tRNA synthetase in the regulation of translation and tumor suppressor activity of aminoacyl-tRNA synthetase-interacting multifunctional protein-3. *Proceedings of the National Academy of Sciences of the United States of America* **108**: 19635-19640

Lackner DH, Schmidt MW, Wu S, Wolf DA, Bahler J (2012) Regulation of transcriptome, translation, and proteome in response to environmental stress in fission yeast. *Genome Biol* **13**: R25

Langfelder P, Zhang B, Horvath S (2008) Defining clusters from a hierarchical cluster tree: the Dynamic Tree Cut package for R. *Bioinformatics* **24**: 719-720

Lee MV, Topper SE, Hubler SL, Hose J, Wenger CD, Coon JJ, Gasch AP (2011) A dynamic model of proteome changes reveals new roles for transcript alteration in yeast. *Mol Syst Biol* **7**: 514

Lee YY, Cevallos RC, Jan E (2009) An upstream open reading frame regulates translation of GADD34 during cellular stresses that induce eIF2alpha phosphorylation. *The Journal of biological chemistry* **284**: 6661-6673

Li JJ, Bickel PJ, Biggin MD (2014a) System wide analyses have underestimated protein abundances and the importance of transcription in mammals. *PeerJ* **2**: e270

Li JJ, Bickel PJ, Biggin MD (2014b) System wide analyses have underestimated protein abundances and the importance of transcription in mammals. *Peerj* **2**

Li JJ, Biggin MD (2015) Statistics requantitates the central dogma. *Science* **347**: 1065-1066

Liang Y, Harris FL, Jones DP, Brown LA (2013) Alcohol induces mitochondrial redox imbalance in alveolar macrophages. *Free radical biology & medicine* **65**: 1427-1434

Lindholm D, Wootz H, Korhonen L (2006) ER stress and neurodegenerative diseases. *Cell death and differentiation* **13**: 385-392

Liu NQ, Dekker LJ, Stingl C, Guzel C, De Marchi T, Martens JW, Foekens JA, Luijck TM, Umar A (2013) Quantitative proteomic analysis of microdissected breast cancer tissues: comparison of label-free and SILAC-based quantification with shotgun, directed, and targeted MS approaches. *J Proteome Res* **12**: 4627-4641

Liu T, Daniels CK, Cao S (2012) Comprehensive review on the HSC70 functions, interactions with related molecules and involvement in clinical diseases and therapeutic potential. *Pharmacol Ther* **136**: 354-374

Lo WS, Gardiner E, Xu Z, Lau CF, Wang F, Zhou JJ, Mendlein JD, Nangle LA, Chiang KP, Yang XL, Au KF, Wong WH, Guo M, Zhang M, Schimmel P (2014) Human tRNA synthetase catalytic nulls with diverse functions. *Science* **345**: 328-332

Margeot A, Garcia M, Wang W, Tetaud E, di Rago JP, Jacq C (2005) Why are many mRNAs translated to the vicinity of mitochondria: a role in protein complex assembly? *Gene* **354**: 64-71

Murray JI, Whitfield ML, Trinklein ND, Myers RM, Brown PO, Botstein D (2004) Diverse and specific gene expression responses to stresses in cultured human cells. *Mol Biol Cell* **15**: 2361-2374

O'Brien TW (2003) Properties of human mitochondrial ribosomes. *IUBMB life* **55**: 505-513

Omranian N, Mueller-Roeber B, Nikoloski Z (2015) Segmentation of biological multivariate time-series data. *Scientific reports* **5**: 8937

Park MC, Kang T, Jin D, Han JM, Kim SB, Park YJ, Cho K, Park YW, Guo M, He W, Yang XL, Schimmel P, Kim S (2012) Secreted human glycyl-tRNA synthetase implicated in defense against ERK-activated tumorigenesis. *Proceedings of the National Academy of Sciences of the United States of America* **109**: E640-647

- Rak M, Gokova S, Tzagoloff A (2011) Modular assembly of yeast mitochondrial ATP synthase. *Embo J* **30**: 920-930
- Robles MS, Cox J, Mann M (2014) In-vivo quantitative proteomics reveals a key contribution of post-transcriptional mechanisms to the circadian regulation of liver metabolism. *PLoS Genet* **10**: e1004047
- Ron D, Hampton RY (2004) Membrane biogenesis and the unfolded protein response. *Journal of Cell Biology* **167**: 23-25
- Roobol A, Roobol J, Bastide A, Knight JR, Willis AE, Smales CM (2015) p58IPK is an inhibitor of the eIF2alpha kinase GCN2 and its localization and expression underpin protein synthesis and ER processing capacity. *The Biochemical journal* **465**: 213-225
- Sano R, Reed JC (2013) ER stress-induced cell death mechanisms. *Biochimica et biophysica acta* **1833**: 3460-3470
- Satpute-Krishnan P, Ajinkya M, Bhat S, Itakura E, Hegde RS, Lippincott-Schwartz J (2014) ER stress-induced clearance of misfolded GPI-anchored proteins via the secretory pathway. *Cell* **158**: 522-533
- Schmidt C, Gronborg M, Deckert J, Bessonov S, Conrad T, Luhrmann R, Urlaub H (2014) Mass spectrometry-based relative quantification of proteins in precatalytic and catalytically active spliceosomes by metabolic labeling (SILAC), chemical labeling (iTRAQ), and label-free spectral count. *RNA* **20**: 406-420
- Schroder M, Kaufman RJ (2005) ER stress and the unfolded protein response. *Mutation research* **569**: 29-63
- Schwanhaussner B, Busse D, Li N, Dittmar G, Schuchhardt J, Wolf J, Chen W, Selbach M (2011) Global quantification of mammalian gene expression control. *Nature* **473**: 337-342
- Schwanhaussner B, Gossen M, Dittmar G, Selbach M (2009) Global analysis of cellular protein translation by pulsed SILAC. *Proteomics* **9**: 205-209
- Smits P, Smeitink J, van den Heuvel L (2010) Mitochondrial translation and beyond: processes implicated in combined oxidative phosphorylation deficiencies. *Journal of biomedicine & biotechnology* **2010**: 737385
- Sriburi R, Jackowski S, Mori K, Brewer JW (2004) XBP1: a link between the unfolded protein response, lipid biosynthesis, and biogenesis of the endoplasmic reticulum. *Journal of Cell Biology* **167**: 35-41
- Tebbe A, Klammer M, Sighart S, Schaab C, Daub H (2015) Systematic evaluation of label-free and super-SILAC quantification for proteome expression analysis. *Rapid Commun Mass Spectrom* **29**: 795-801
- Teo G, Vogel C, Ghosh D, Kim S, Choi H (2014) PECA: a novel statistical tool for deconvoluting time-dependent gene expression regulation. *Journal of proteome research* **13**: 29-37

- Vattem KM, Wek RC (2004) Reinitiation involving upstream ORFs regulates ATF4 mRNA translation in mammalian cells. *Proceedings of the National Academy of Sciences of the United States of America* **101**: 11269-11274
- Vembar SS, Brodsky JL (2008) One step at a time: endoplasmic reticulum-associated degradation. *Nat Rev Mol Cell Bio* **9**: 944-U930
- Venditti P, Di Stefano L, Di Meo S (2013) Mitochondrial metabolism of reactive oxygen species. *Mitochondrion* **13**: 71-82
- Ventoso I, Kochetov A, Montaner D, Dopazo J, Santoyo J (2012) Extensive translome remodeling during ER stress response in mammalian cells. *PLoS One* **7**: e35915
- Vogel C, Abreu RD, Ko DJ, Le SY, Shapiro BA, Burns SC, Sandhu D, Boutz DR, Marcotte EM, Penalva LO (2010) Sequence signatures and mRNA concentration can explain two-thirds of protein abundance variation in a human cell line. *Molecular systems biology* **6**
- Vogel C, Marcotte EM (2012) Insights into the regulation of protein abundance from proteomic and transcriptomic analyses. *Nat Rev Genet* **13**: 227-232
- Vogel C, Silva GM, Marcotte EM (2011) Protein expression regulation under oxidative stress. *Molecular & cellular proteomics : MCP* **10**: M111 009217
- Wallace DC, Fan W, Procaccio V (2010) Mitochondrial energetics and therapeutics. *Annual review of pathology* **5**: 297-348
- Wei N, Shi Y, Truong LN, Fisch KM, Xu T, Gardiner E, Fu G, Hsu YS, Kishi S, Su AI, Wu X, Yang XL (2014) Oxidative stress diverts tRNA synthetase to nucleus for protection against DNA damage. *Molecular cell* **56**: 323-332
- Williams CC, Jan CH, Weissman JS (2014) Targeting and plasticity of mitochondrial proteins revealed by proximity-specific ribosome profiling. *Science* **346**: 748-751
- Yan W, Frank CL, Korth MJ, Sopher BL, Novoa I, Ron D, Katze MG (2002) Control of PERK eIF2alpha kinase activity by the endoplasmic reticulum stress-induced molecular chaperone P58IPK. *Proceedings of the National Academy of Sciences of the United States of America* **99**: 15920-15925
- Yoshida H (2007) ER stress and diseases. *The FEBS journal* **274**: 630-658
- Zhang L, Fok JJ, Mirabella F, Aronson LI, Fryer RA, Workman P, Morgan GJ, Davies FE (2013) Hsp70 inhibition induces myeloma cell death via the intracellular accumulation of immunoglobulin and the generation of proteotoxic stress. *Cancer letters* **339**: 49-59
